# Supplementary material
Source: publisher site journal article supplement (https://www.dovepress.com/article/572068)
Supplement: Supplementary file 1 [file 572068%20Supplementary%20Table%201.docx]

**Table S1 Basic Characteristics of the KYRBS Participants According to Suicidal Ideation**

| **Characteristics** | | | **Total** | | **Suicidal Ideation**  **(-)** | | | **Suicidal Ideation**  **(+)** | | | ***P*-value** | | ***P* for trend** |
| --- | --- | --- | --- | --- | --- | --- | --- | --- | --- | --- | --- | --- | --- |
| **N** | **%** | **N** | | **%** | **N** | | **%** |
| Overall | | | 759,350 | 100.0 | 638,288 | | 82.6 | 121,062 | | 17.4 |  | |  |
| Sex | | |  |  |  | |  |  | |  | <0.001 | |  |
|  | | Boys | 386,636 | 51.9 | 339,042 | | 87.5 | 47,594 | | 12.5 |  | |  |
|  | | Girls | 372,714 | 48.1 | 299,246 | | 80.2 | 73,468 | | 19.9 |  | |  |
| School | | |  |  |  | |  |  | |  | <0.001 | |  |
|  | | Middle school | 373,980 | 47.4 | 313,082 | | 83.4 | 60,898 | | 16.6 |  | |  |
|  | | High school | 385,370 | 52.6 | 325,206 | | 84.5 | 60,164 | | 15.5 |  | |  |
| Age (years) | | |  |  |  | |  |  | |  | <0.001 | | 0.049 |
|  | | 12 | 55,861 | 6.9 | 47,459 | | 84.4 | 8,402 | | 15.6 |  | |  |
|  | | 13 | 123,184 | 15.5 | 103,337 | | 83.4 | 19,847 | | 16.6 |  | |  |
|  | | 14 | 127,011 | 16.3 | 106,031 | | 83.3 | 20,980 | | 16.7 |  | |  |
|  | | 15 | 129,282 | 17.3 | 108,500 | | 83.9 | 20,782 | | 16.1 |  | |  |
|  | | 16 | 129,670 | 17.7 | 109,445 | | 84.6 | 20,225 | | 15.4 |  | |  |
|  | | 17 | 130,031 | 17.9 | 109,602 | | 84.4 | 20,429 | | 15.6 |  | |  |
|  | | 18 | 60,932 | 8.5 | 51,359 | | 84.4 | 9,573 | | 15.6 |  | |  |
| Residency | | |  |  |  | |  |  | |  | <0.001 | | <0.001 |
|  | | Rural | 78,803 | 6.0 | 65,708 | | 84.2 | 13,095 | | 15.8 |  | |  |
|  | | Urban | 327,349 | 48.0 | 276,356 | | 84.2 | 50,984 | | 15.8 |  | |  |
|  | | Metro city | 353,198 | 46.0 | 296,215 | | 83.6 | 56,983 | | 16.4 |  | |  |
| Socioeconomic status | | |  |  |  | |  |  | |  | <0.001 | | <0.001 |
|  | | Very rich | 57,316 | 7.7 | 49,461 | | 86.0 | 7,855 | | 14.0 |  | |  |
|  | | Rich | 189,795 | 25.5 | 163,802 | | 86.1 | 25,993 | | 14.0 |  | |  |
|  | | Middle | 361,267 | 47.3 | 309,623 | | 85.6 | 51,644 | | 14.4 |  | |  |
|  | | Poor | 118,576 | 15.3 | 92,890 | | 78.4 | 25,686 | | 21.6 |  | |  |
|  | | Very poor | 32,396 | 4.2 | 22,512 | | 69.3 | 9,884 | | 30.7 |  | |  |
| Academic performance | | |  |  |  | |  |  | |  | <0.001 | | <0.001 |
|  | | Very good | 91,780 | 12.0 | 79,630 | | 86.7 | 12,150 | | 13.3 |  | |  |
|  | | Good | 189,183 | 24.9 | 162,784 | | 85.9 | 26,399 | | 14.1 |  | |  |
|  | | Middle | 212,348 | 28.0 | 181,948 | | 85.7 | 30,400 | | 14.3 |  | |  |
|  | | Bad | 182,819 | 24.1 | 149,723 | | 81.8 | 33,096 | | 18.2 |  | |  |
|  | | Very bad | 83,220 | 10.9 | 64,203 | | 77.0 | 19,017 | | 23.0 |  | |  |
| Physical activity  (per week) | | |  |  |  | |  |  | |  | <0.001 | | <0.001 |
|  | | None | 208,655 | 27.8 | 171,743 | | 82.3 | 36,912 | | 17.7 |  | |  |
|  | | 1 day | 150,064 | 19.7 | 125,966 | | 83.9 | 24,098 | | 16.1 |  | |  |
|  | | 2 days | 139,095 | 18.5 | 117,730 | | 84.5 | 21,365 | | 15.5 |  | |  |
|  | | 3 days | 108,972 | 14.4 | 92,325 | | 84.6 | 16,647 | | 15.4 |  | |  |
|  | | 4 days | 48,151 | 6.3 | 41,146 | | 85.3 | 7,005 | | 14.7 |  | |  |
|  | | ≥5 days | 104,413 | 13.4 | 89,378 | | 85.4 | 15,035 | | 14.6 |  | |  |
| Alcohol consumption | | |  |  |  | |  |  | |  | <0.001 | |  |
|  | | No | 400,329 | 52.3 | 351,374 | | 87.6 | 48,955 | | 12.4 |  | |  |
|  | | Yes | 359,021 | 47.7 | 286,914 | | 80.0 | 72,107 | | 20.0 |  | |  |
| Smoking | | |  |  |  | |  |  | |  | <0.001 | |  |
|  | | No | 600,466 | 78.9 | 516,304 | | 85.8 | 84,162 | | 14.2 |  | |  |
|  | | Yes | 158,884 | 21.1 | 121,984 | | 77.1 | 36,900 | | 23.0 |  | |  |
| Sleep timing | | |  |  |  |  | |  |  | | <0.001 | <0.001 | |
|  | 8 PM | | 1,204 | 0.1 | 961 | 79.3 | | 243 | 20.7 | |  |  | |
|  | 9 PM | | 10,096 | 1.1 | 8,608 | 85.1 | | 1,488 | 14.9 | |  |  | |
|  | 10 PM | | 56,176 | 6.4 | 49,025 | 87.0 | | 7,151 | 13.0 | |  |  | |
|  | 11 PM | | 170,252 | 21.1 | 147,551 | 86.7 | | 22,701 | 13.3 | |  |  | |
|  | 12 AM | | 202,587 | 27.0 | 171,801 | 84.8 | | 30,786 | 15.2 | |  |  | |
|  | 1 AM | | 184,172 | 25.2 | 153,524 | 83.4 | | 30,648 | 16.6 | |  |  | |
|  | 2 AM | | 105,135 | 14.8 | 84,307 | 80.4 | | 20,828 | 19.7 | |  |  | |
|  | 3 AM | | 29,728 | 4.2 | 22,511 | 75.8 | | 7,217 | 24.2 | |  |  | |

**Table S1 (*Continued*)**

| Wake timing | |  |  |  |  |  |  | <0.001 | <0.001 |
| --- | --- | --- | --- | --- | --- | --- | --- | --- | --- |
|  | 4 AM | 2,454 | 0.3 | 1,779 | 71.9 | 675 | 28.2 |  |  |
|  | 5 AM | 32,478 | 3.9 | 25,698 | 78.4 | 6,780 | 21.6 |  |  |
|  | 6 AM | 322,431 | 42.0 | 267,693 | 83.0 | 54,738 | 17.0 |  |  |
|  | 7 AM | 377,471 | 50.3 | 322,222 | 85.2 | 55,249 | 14.8 |  |  |
|  | 8 AM | 24,516 | 3.4 | 20,896 | 85.3 | 3,620 | 14.7 |  |  |
| Sleep duration | |  |  |  |  |  |  | <0.001 | <0.001 |
|  | <3 h | 15,514 | 2.2 | 11,082 | 71.4 | 4,432 | 28.6 |  |  |
|  | 4 h | 66,412 | 9.2 | 51,882 | 78.3 | 14,530 | 21.7 |  |  |
|  | 5 h | 148,553 | 20.4 | 121,963 | 82.2 | 26,590 | 17.8 |  |  |
|  | 6 h | 185,659 | 25.0 | 155,964 | 84.1 | 29,695 | 16.0 |  |  |
|  | 7 h | 181,325 | 23.4 | 155,148 | 85.6 | 26,177 | 14.4 |  |  |
|  | 8 h | 121,393 | 15.0 | 106,647 | 87.8 | 14,746 | 12.2 |  |  |
|  | ≥9 h | 40,494 | 4.8 | 35,602 | 87.8 | 4,892 | 12.2 |  |  |
| Sleep quality | |  |  |  |  |  |  | <0.001 | <0.001 |
|  | Very good | 54,264 | 7.0 | 49,271 | 90.4 | 4,993 | 9.6 |  |  |
|  | Good | 141,426 | 18.5 | 127,092 | 89.7 | 14,334 | 10.3 |  |  |
|  | Middle | 250,734 | 33.1 | 216,302 | 86.3 | 34,432 | 13.7 |  |  |
|  | Bad | 214,557 | 28.4 | 175,154 | 81.6 | 39,403 | 18.4 |  |  |
|  | Very bad | 98,369 | 13.0 | 70,469 | 71.7 | 27,900 | 28.4 |  |  |
| Depressive mood | |  |  |  |  |  |  | <0.001 |  |
|  | No | 525,376 | 69.1 | 495,268 | 94.2 | 30,108 | 5.8 |  |  |
|  | Yes | 233,974 | 30.9 | 143,020 | 61.1 | 90,954 | 38.9 |  |  |

**Notes**: % from weighted proportion.

*P*-value from chi-squared test; *P* for trend from survey-weighted linear trend test; *P*-values <0.001 were reported as <0.001; all other *P*-values were reported to three decimal places.

“Suicidal ideation (-)” indicates adolescents without suicidal ideation; “Suicidal ideation (+)” indicates adolescents who reported suicidal ideation during the past 12 months.

**Abbreviations:** KYRBS; Korea Youth Risk Behavior Web-based Survey.
